# Supplementary material for: The αMSH-Dependent PI3K Pathway Supports Energy Metabolism, via Glucose Uptake, in Melanoma Cells
Source: MDPI journal article supplement (doi:10.3390/cells12071099), 2023-04-06
Supplement: s1 [file s1]

**A**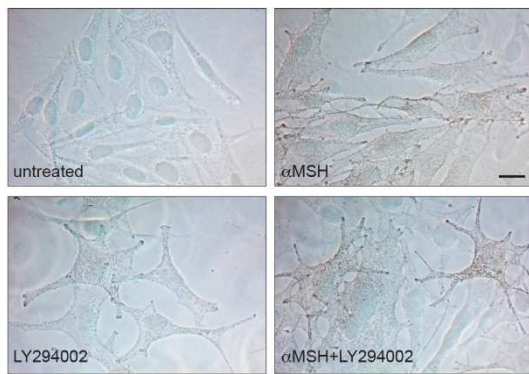**B**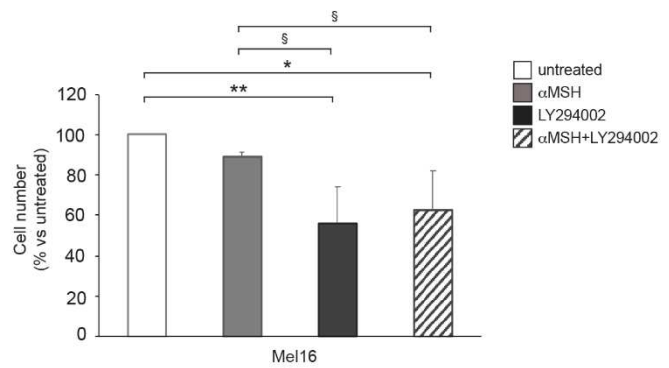

**Supplementary Figure S1.** The  $\alpha$ MSH-mediated PI3K/AKT pathway influences dendricity, pigmentation and cell proliferation of Mel16 melanoma cells. Phase contrast analysis (A) and cell count (B) of Mel16 cells treated with  $\alpha$ MSH in the presence or absence of LY294002 for 48 hours. Scale bar: 20  $\mu$ m. \* $p$ <0.05, \*\* $p$ <0.01 vs untreated; § $p$ <0.05 vs  $\alpha$ MSH.

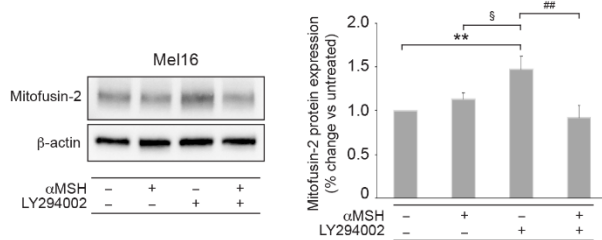

**Supplementary Figure S2.** Western blot and densitometric analysis of Mitofusin-2 expression in Mel16 cells treated with  $\alpha$ MSH, LY294002 and  $\alpha$ MSH plus LY294002 for 24 hours. \*\* $p$ <0.01 vs untreated; § $p$ <0.05 vs  $\alpha$ MSH; ## $p$ <0.05 vs LY294002.
